# Supplementary material for: Nanoarhitectonics of Inorganic–Organic Silica–Benzil Composites: Synthesis, Nanocrystal Morphology and Micro-Raman Analysis
Source: MDPI journal article supplement (doi:10.3390/nano13131913), 2023-06-23
Supplement: s1 [file s1]

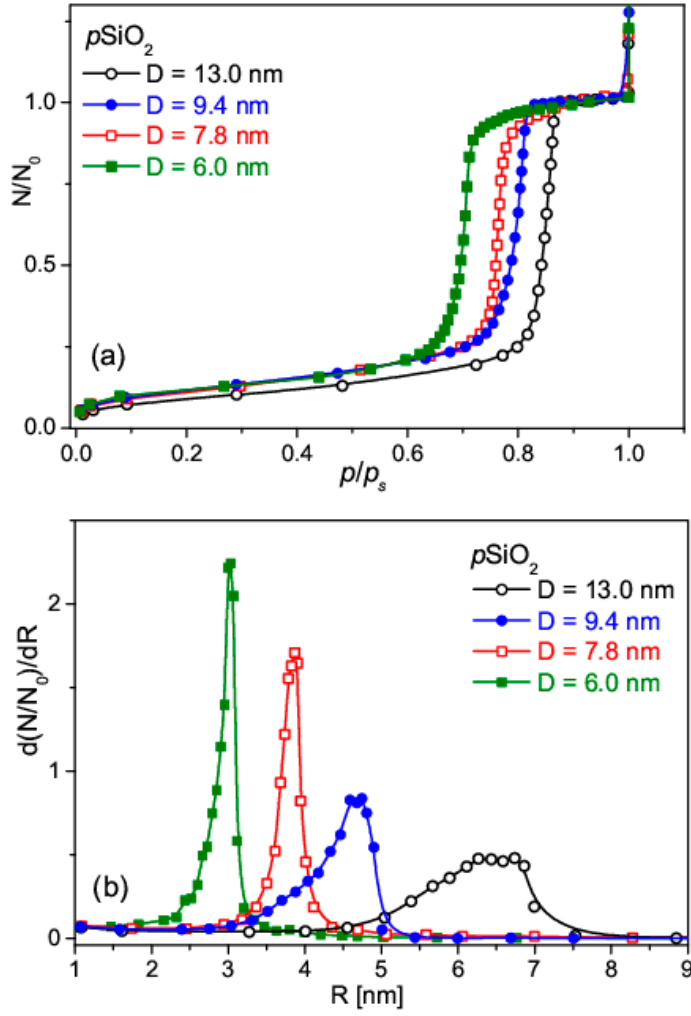

**Figure S1.** Nitrogen desorption isotherms recorded at  $T=77\text{K}$  (a) and extracted the relevant pore size distributions (b) for mesoporous silica membranes of different channel diameters,  $D$ , see labelled.  $R$ -scale in section (b) is shifted to the left by the thickness of adsorbed nitrogen monolayer (0.3 nm). The maximum of the distribution curves corresponds to the average channel radius  $R_0=D/2$ .  $N/N_0$  is the fraction filling,  $p/p_s$  is the reduced pressure,  $p_s$  is the bulk saturated pressure of Nitrogen at  $T=77\text{K}$ ,  $R$  is the pore radius.

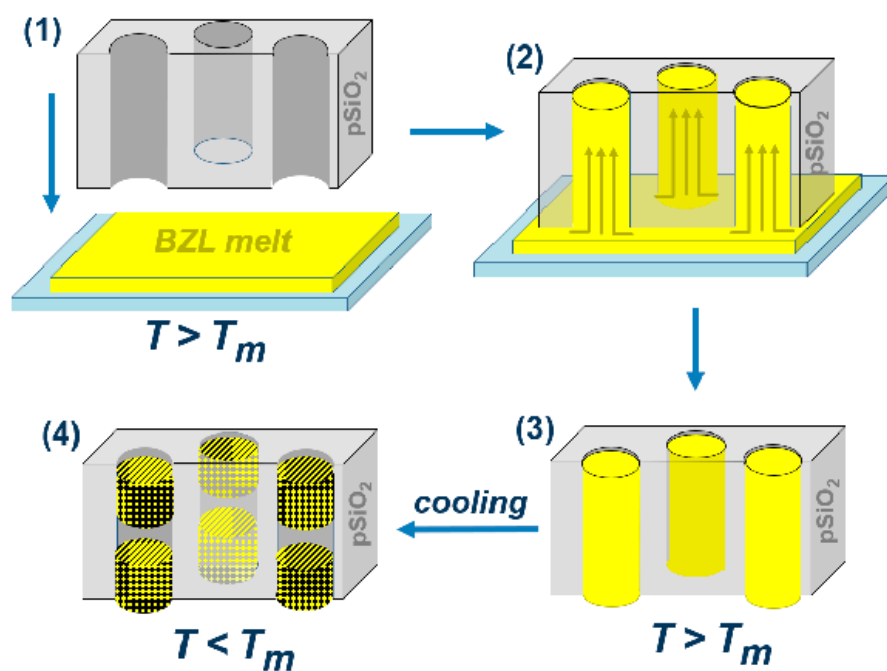

**Figure S2.** Synthesis of silica-benzil nanocomposites. The dried tubular pSiO<sub>2</sub> matrices were subjected to contact with melt benzil (BZL) layer (1) and completely filled with melted benzil by spontaneous capillary inhibition (2) at a temperature a little above the melting point ( $T > T_m = 368$  K). A further cooling (2K/min) of capillary filled free standing membrane (3) down to room temperature leads to the crystallization of the filler and the formation of benzil crystalline nanoclusters inside the silica nanochannels (4).

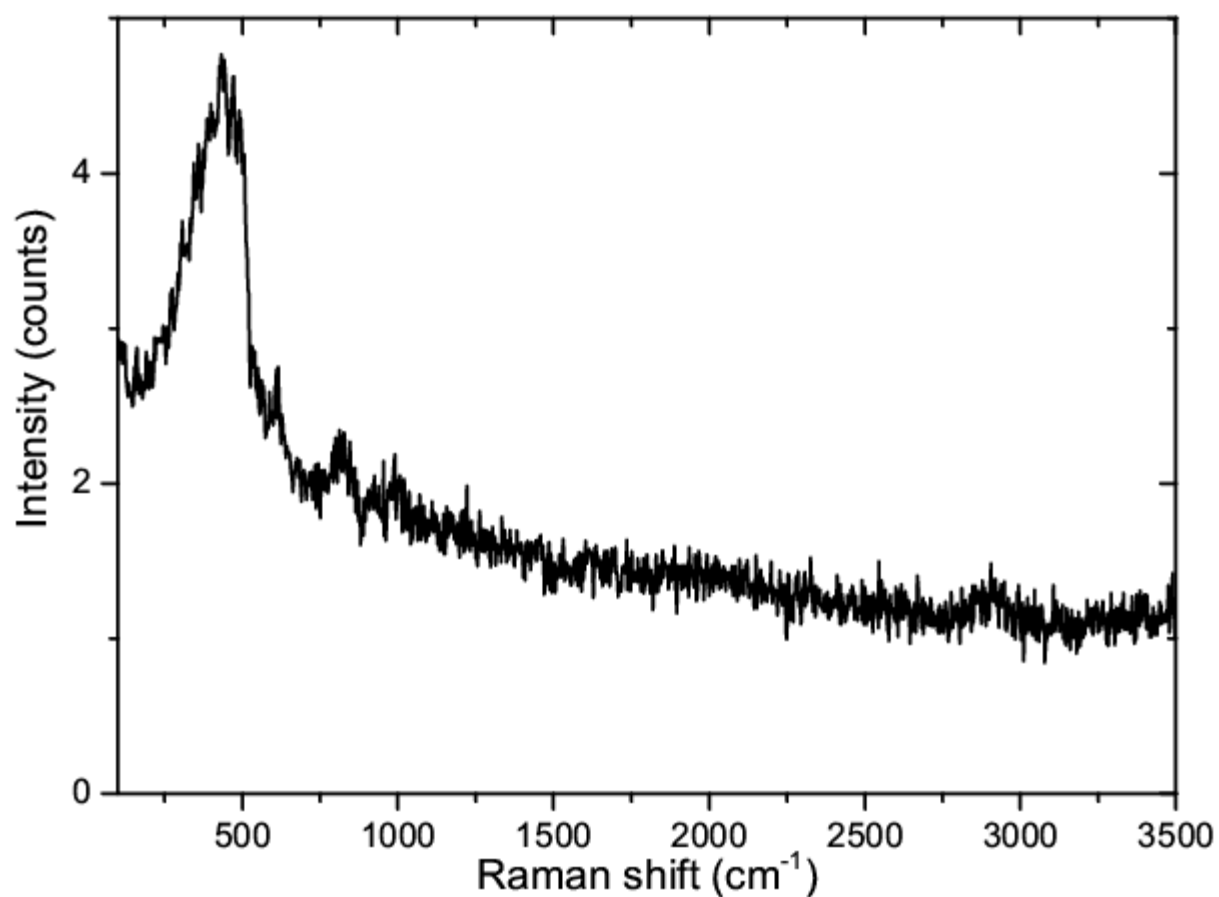

**Figure S3.** Raman spectrum of bare porous SiO<sub>2</sub> membrane, where the peaks at 430, 610, and 800 cm<sup>-1</sup> as reported in the literature [S1] can be observed. The shape of Raman spectrum does not depend on pore diameter, 6.0, 7.8, 9.4 or 13.0 nm.

[S1]. F. L. Galeener and A. E. Geissberger, Vibrational dynamics in <sup>30</sup>Si-substituted vitreous SiO<sub>2</sub>. *Phys. Rev. B*, 27:6199-6204, 1983
